# 1 Continuous Bayesian Variant Interpretation

## 2 Accounts for Incomplete Penetrance among

### 3 Mendelian Cardiac Channelopathies

#### 4 Short Title: Continuous Bayesian Penetrance Probabilities

5  
6 Matthew J. O'Neill<sup>1</sup>, Luca Sala<sup>2</sup>, Isabelle Denjoy<sup>3</sup>, Yuko Wada<sup>4</sup>,

7 Krystian Kozek<sup>1</sup>, Lia Crotti<sup>2</sup>, Federica Dagradi<sup>2</sup>, Maria-Christina Kotta<sup>2</sup>, Carla Spazzolini<sup>2</sup>,

8 Antoine Leenhardt<sup>3</sup>, Joe-Elie Salem<sup>3</sup>, Asami Kashiwa<sup>5</sup>, Seiko Ohno<sup>6</sup>, Ran Tao<sup>7</sup>, Dan M. Roden<sup>8</sup>,

9 Minoru Horie<sup>9</sup>, Fabrice Extramiana<sup>3</sup>, Peter J. Schwartz<sup>2</sup>, and Brett M. Kroncke<sup>4\*</sup>

10  
11 1. Vanderbilt University School of Medicine, Medical Scientist Training Program, Vanderbilt  
12 University, Nashville, TN

13 2. IRCCS, Istituto Auxologico Italiano, Center for Cardiac Arrhythmias of Genetic Origin and  
14 Laboratory of Cardiovascular Genetics, Milano, Italy

15 3. Department of Cardiovascular Medicine, Hôpital Bichat, APHP, Université de Paris Cité,  
16 Paris, France

17 4. Vanderbilt Center for Arrhythmia Research and Therapeutics (VanCART), Division of  
18 Clinical Pharmacology, Department of Medicine, Vanderbilt University Medical Center,  
19 Nashville, TN

20 5. Department of Cardiovascular Medicine, Kyoto University Graduate School of Medicine  
21 Kyoto, Japan

22 6. Department of Bioscience and Genetics, National Cerebral and Cardiovascular Center,  
23 Osaka, Japan

- 24        7. Department of Biostatistics, Vanderbilt University Medical Center, Nashville, TN
- 25        8. Vanderbilt Center for Arrhythmia Research and Therapeutics (VanCART), Departments
- 26            of Medicine, Pharmacology, and Biomedical Informatics, Vanderbilt University Medical
- 27            Center, Nashville, TN
- 28        9. Department of Cardiovascular Medicine, Shiga University of Medical Science, Shiga,
- 29            Japan

30

31    \*Correspondence to Brett M. Kroncke:

32    Office 1215E Light Hall/Medical Research Building IV

33    2215 Garland Avenue

34    Nashville, TN, 37232

35    [brett.m.kroncke.1@vumc.org](mailto:brett.m.kroncke.1@vumc.org)

36 **Abstract**

37

38 **Background:** The congenital Long QT Syndrome (LQTS) and Brugada Syndrome (BrS) are  
39 Mendelian autosomal dominant diseases which frequently precipitate fatal cardiac arrhythmias.  
40 Incomplete penetrance is a barrier to clinical management of heterozygotes harboring variants  
41 in the major implicated disease genes *KCNQ1*, *KCNH2*, and *SCN5A*. We apply and evaluate a  
42 Bayesian penetrance estimation strategy that accounts for this phenomenon and evaluate  
43 penetrance distributions and rationalize their structural underpinnings across four genotype-  
44 phenotype pairs.

45

46 **Methods:** We generated Bayesian penetrance estimation models for *KCNQ1*-LQT1 and  
47 *SCN5A*-LQT3 using variant-specific features and clinical data from the literature, international  
48 arrhythmia genetic centers, and population controls. We analyzed the distribution of posterior  
49 penetrance estimates across four-genotype phenotype relationships and compared continuous  
50 estimates to ClinVar annotations. Posterior estimates were mapped onto protein structure.

51

52 **Results:** Bayesian models of *KCNQ1*-LQT1 and *SCN5A*-LQT3 are well-calibrated to clinical  
53 observations. Variant-informed penetrance estimates of *KCNQ1*-LQT1 and *SCN5A*-LQT3 are  
54 empirically equivalent to 10 and 5 heterozygote clinical phenotypes, respectively. Posterior  
55 penetrance estimates were bimodal for *KCNQ1*-LQT1 and *KCNH2*-LQT2, with a higher fraction  
56 of missense variants with high penetrance among *KCNQ1* variants. *SCN5A*-LQT3 and *SCN5A*-  
57 BrS had comparatively more variants with predicted low penetrance. There was a wide  
58 distribution of variant penetrance estimates among similar categories of ClinVar annotations.  
59 Structural mapping revealed heterogeneity among 'hot spot' regions and featured high  
60 penetrance estimates for *KCNQ1* variants in contact with calmodulin and the S6 domain.

61

62 **Conclusions:** Bayesian penetrance estimates provide a continuous framework for variant  
63 interpretation, provide higher resolution within ‘hot spot’ domains, and facilitate prospective  
64 clinical management of variant heterozygotes.

65

## 66 Introduction

67 Incomplete penetrance is a hallmark of the inconsistency of genetic determinism, where  
68 heterozygotes harboring the same variant may manifest a continuum of the disease phenotype,  
69 or none at all<sup>1-3</sup>. The nuance of incomplete penetrance is frequently unaccounted for in  
70 contemporary genetic methods development; probabilistic approaches may more accurately  
71 account for variable genetic contributions to disease presentation. The American College of  
72 Medical Genetics and Genomics (ACMG) has established criteria for adjudicating the  
73 'pathogenicity' of variants, drawing to varying extents on population frequency data, segregation  
74 within families, *in silico* methods, and functional data, among other sources<sup>4</sup>. However, this  
75 categorical approach is unable to account for incomplete penetrance, especially among ClinVar-  
76 annotated Pathogenic or Likely Pathogenic variants<sup>5</sup>.

77 Clinical management of patients affected by inherited arrhythmic syndromes is a salient  
78 example of this challenge. The Long QT Syndromes Type 1-3 (LQT1-3 [MIM: 192500, 613688,  
79 603830], respectively) and Brugada Syndrome (BrS [MIM 601144]) are frequently responsible  
80 for Sudden Cardiac Death<sup>6</sup>. The most rigorously established genotype-phenotype relationships  
81 are loss-of-function variants in *KCNQ1* encoding K<sub>v</sub>7.1 (LQT1), *KCNH2* encoding K<sub>v</sub>11.1  
82 (LQT2), and *SCN5A* encoding Na<sub>v</sub>1.5 (BrS) and gain-of-function variants in *SCN5A* (LQT3)<sup>7,8</sup>.  
83 These membrane proteins are responsible for orchestrating the cardiac action potential through  
84 cardiomyocyte depolarization and repolarization. All four of these genotype-phenotype pairs are  
85 characterized by a significant degree of incomplete penetrance<sup>9</sup>, which may in part be  
86 accounted for by environmental risk factors as well as polygenic liability<sup>10-12</sup>. The ability to  
87 accurately predict variant penetrance is especially important, since medical or interventional  
88 therapies are well established to lower the risk of fatal ventricular arrhythmias<sup>6</sup>; however, overly  
89 aggressive management may conversely cause harm<sup>13,14</sup>. New methods for variant  
90 interpretation that capture the granularity of clinical penetrance in a probabilistic manner will  
91 help facilitate the clinical management of variant heterozygotes.

92           Herein, we elaborate a framework where variant-specific features inform a continuous,  
93 quantitative probability of disease manifestation (penetrance) for missense variants – in contrast  
94 to the probability of ‘pathogenic’ or ‘benign’ classification<sup>15,16</sup>. These prior estimates are  
95 calibrated to clinically observed penetrance from the spectrum of all available variant-specific  
96 feature data. Within a Bayesian framework, we apply clinical evidence from phenotyped  
97 individuals from the literature, arrhythmia genetics clinical cohorts, and putative population  
98 controls to these calibrated prior estimates of disease probability to yield posterior penetrance  
99 estimates (Figure 1). This approach recasts nuanced variant features, previously only  
100 interpretable by specialists, e.g., structural and channel biophysical properties, to a wider  
101 audience as an equivalent number of clinically phenotyped heterozygotes. These estimates can  
102 therefore inform clinical management in the absence of prior clinical observations of a variant, or  
103 aid in interpretation of variants when few heterozygotes have been clinically phenotyped.

104           Implementing two instances of this approach, we develop penetrance models for  
105 *KCNQ1-LQT1* and *SCN5A-LQT3*, incorporate data from *KCNH2-LQT2*<sup>17</sup> and *SCN5A-BrS1*<sup>18</sup>,  
106 and investigate penetrance across these four genotype-phenotype relationships. We  
107 demonstrate how penetrance varies among these genotype-phenotype relationships and  
108 correlate penetrance with structural features of each gene product.

109

110 **Materials and Methods**

111 All data and code used to generate and evaluate the models are available on GitHub. Results  
112 are also curated in the *KCNQ1* and *SCN5A* variant browsers (see Web Resources). Detailed  
113 methods are available in the Supplemental Methods.

114

115

## 116 **Results**

117 *Evaluation and Performance of KCNQ1 Variant Penetrance Model.* We implemented a  
118 Bayesian penetrance model using all available data for the *KCNQ1*-LQT1 genotype-phenotype  
119 pair (Figure 1)<sup>17,18</sup>. We curated >2,000 manuscripts from the literature, and in combination with  
120 phenotyped heterozygotes from international arrhythmia clinics and putative heterozygote  
121 controls from gnomAD<sup>19</sup>, found 9,969 *KCNQ1* heterozygotes harboring 630 unique missense  
122 and in-frame insertion/deletion variants. Plotting the observed penetrance of each variant by  
123 residue recapitulated known associations with 'hot spot' regions of the protein; plotting our  
124 structural penetrance density metric<sup>20</sup> (residue weighted by penetrance of adjacent residues in  
125 3D environment) by residue resulted in more continuous estimates (Supplemental Figure 1).

126

127 We evaluated the functional, *in silico*, and structural features against the estimated LQT1  
128 penetrance (the observed penetrance modestly biased towards the mean, called the empirical  
129 posterior, see Materials and Methods) using Spearman-rank order coefficients, weighted  
130 towards variants with many clinical observations (Figure 2 and Supplemental Table 1). We  
131 found many channel biophysical properties were statistically significant (nominal  $p < 0.05$ ). For  
132 example, reductions in peak current decrease repolarization and, as the primary molecular  
133 correlate of LQT1, predict higher LQT1 penetrance (Figure 2; Spearman correlation coefficient -  
134 0.55 homozygous, -0.54 heterozygous). CardioBoost<sup>21</sup> had the highest correlation coefficient  
135 (+0.64) of the *in silico* predictors, followed by REVEL<sup>22</sup> (+0.64) and Provean<sup>23</sup> (-0.61). The  
136 structural LQT1-dist covariate had a Spearman correlation coefficient of +0.54. Integrating the  
137 most relevant features using our previously described method<sup>17</sup>, we derived a LQT1 Bayesian  
138 prior with a coefficient of +0.71 (10-fold cross validated Spearman correlation coefficient +0.65 –  
139 see Materials and Methods). We additionally evaluated model covariates using Brier scores<sup>24</sup>, a  
140 probabilistic forecasting metric where 0 is most favorable, and 1 is least favorable (Table 1). We



141 observe Brier scores for the LQT1-dist metric of 0.062 while the *in silico* covariates CardioBoost  
142 (0.19), REVEL (0.17), and PolyPhen2 (0.22) performed less well. The Brier score for the  
143 Bayesian prior was 0.028 (10-fold cross validated Brier score 0.033) and 0.011 for the Bayesian  
144 posterior.

145

146 A central advantage of our Bayesian penetrance estimate is the quantification of uncertainty  
147 (Supplemental Figure 2 – see Materials and Methods)<sup>17</sup>. This is expressed as a hypothetical  
148 number of heterozygotes, e.g., 7 of 10 clinically phenotyped individuals with a phenotype has a  
149 greater uncertainty than 700 of 1,000 clinically phenotyped heterozygotes with a phenotype,  
150 though the estimated penetrance is the same. To arrive at this number, we empirically test a  
151 tuning parameter, equivalent to the number of hypothetically phenotyped heterozygotes, such  
152 that 95% of the true observations (per variant empirical posterior) are contained within the EM  
153 posterior's 95% credible interval across the distribution from 0 to 1.0 using boot strap sampling  
154 (Supplemental Figure 2 – see outcomes with several tuning parameters tested). From this  
155 analysis, for *KCNQ1-LQT1*, we suggest the Bayesian prior is empirically equivalent to the  
156 information contained in approximately 10 clinically phenotyped individuals.

157

158 In Figure 3, we provide a representative example of the prior and posterior penetrance  
159 estimates obtained by our approach imposed on the latter part of the S6 transmembrane  
160 segment into the C-terminus (residues 350-400). The forest plot shows prior (green, blue, and  
161 red) and posterior (black) estimates and their corresponding 95% credible intervals for variants  
162 harbored by at least five heterozygotes. The 95% credible interval of the Bayesian prior  
163 estimate is narrowed after the application of the likelihood (heterozygote status). For example,  
164 for the variant p.Ala370Val, there is a moderate Bayesian prior probability (0.28). After applying  
165 the clinical likelihood (1 affected heterozygote of 45 observed heterozygotes), the Bayesian  
166 posterior is decreased (.067) along with the respective 95% credible interval. This method

167 provides a best probability estimate for these variants, which intrinsically accounts for  
168 incomplete penetrance, even among high-penetrance variants.

169  
170 *LQT3 Penetrance.* We performed a similar analysis for the *SCN5A*-LQT3 genotype-phenotype  
171 pair. In contrast to LQT1, the LQT3 phenotype arises from a specific loss of channel  
172 inactivation, which may arise through late current, window current, or altered kinetics of  
173 inactivation<sup>25</sup>. We previously curated a dataset to evaluate this relationship empirically<sup>18</sup>, which  
174 includes a total of 86,118 *SCN5A* heterozygotes with 1,243 manifesting the LQT3 phenotype.  
175 Analogous to LQT1, we updated prior penetrance estimates based on functional, structural, and  
176 *in silico* features with this clinical evidence. The posterior estimates were empirically shown to  
177 be equivalent to the information contained in 5 clinical observations of heterozygotes using the  
178 same framework described above (Supplemental Figure 3).

179  
180 *Bayesian Estimates Reflects Gene-specific Penetrance Among Channelopathies.* To assess  
181 differences in penetrance among the four channelopathies (LQT1-3 and BrS), we compared the  
182 Bayesian posterior penetrance estimate distributions for each gene-disease pair (Figure 4).  
183 Observed penetrance (strictly frequentist) tends towards 0 or 1 owing to most unique variants  
184 being observed in a single or few phenotyped heterozygotes (Figure 4A). The Bayesian  
185 posterior penetrance estimates are distributed over a continuous bimodal distribution (Figure  
186 4B). We observe a cluster of variants with low penetrance estimates, followed by a second  
187 cluster with higher estimates which may loosely map onto the categorical ACMG framework. We  
188 interpret these estimates as indicating ‘benign’ at low estimated penetrance, followed by a  
189 continuous gradation of ‘risk allele’ to ‘pathogenic low penetrance’ to ‘pathogenic’ variants.  
190 Formalizing these estimates as continuous disease-presentation probabilities explicitly accounts  
191 for incomplete penetrance along this continuum. *SCN5A* variants associated with BrS and LQT3  
192 do not display the same extent of bimodal distribution as those in *KCNQ1* and feature

193 comparatively more variants predicted to have very low penetrance (Figure 4C and 4D). This  
194 finding partially reflects the composition of *SCN5A*, at approximately four times the size of  
195 *KCNQ1* with large linkers (400 residues) between membrane spanning segments largely  
196 uninvolved in channel function and correspondingly low estimated penetrance. Finally, *KCNH2*  
197 variants also have a bimodal distribution like those for *KCNQ1* variants, but with a smaller  
198 fraction predicted at high penetrance (Figure 4E). These observations also reflect the relative  
199 fraction of functionally relevant residues within the gene. These differences are quantified in  
200 Figure 4F. These distributions indicate half of identified *KCNQ1* variants have a penetrance  
201 estimate of at least 0.41, suggesting a randomly chosen *KCNQ1* variant has a 50% chance of  
202 producing a LQT1 penetrance greater than 41%. The probability distributions skew comparably  
203 lower for *KCNH2*-LQT2 and *SCN5A*-LQT3 where half of observed variants have penetrance  
204 estimates lower than 0.157 and 0.063, respectively.

205  
206 *Distribution of Posterior Estimates within Individual ClinVar Annotations.* We next investigated  
207 how our Bayesian estimates and observed penetrance compared with ClinVar categorical  
208 designations. In Figure 5A, we present posterior estimates for Benign/Likely Benign (B/LB) and  
209 Pathogenic/Likely Pathogenic (P/LP) variants for *KCNQ1*. Plotting the observed penetrance vs  
210 category reveals that many variants are incompletely penetrant (Figure 5A). We observe that  
211 the Bayesian estimates for B/LB cluster close to 0, although we show remarkable heterogeneity  
212 for estimates of the P/LP variants (ranging from 0.17-0.90). We repeated this analysis for  
213 variants within *KCNH2* (Figures 5C and 5D). We again observe distributions of Bayesian  
214 penetrance estimates (0.093-0.95) as well as a high degree of incomplete penetrance among  
215 P/LP variants. Some P/LP variants have been observed in relatively few individuals without a  
216 phenotype, and therefore have an observed penetrance of 0 (Figure 5A/C). Further investigation  
217 revealed that several of these variants have a P/LP ClinVar annotation which includes private

218 communications about heterozygote clinical phenotypes (such as *KCNH2* p.Gly657Ser), which  
219 were therefore unavailable to incorporate into our model.

220  
221 *Structural Implications of Variable Penetrance.* We mapped posterior penetrance estimates onto  
222 Cryo-EM structures (PDBIDs 5VMS, 5VA1, and 5X0M for KCNQ1, KCNH2, and SCN5A  
223 [homology modeled to include the c-terminal EF hand domain], respectively) of each protein and  
224 interrogated global and ‘hot spot’ penetrance heterogeneity. As shown in Figure 6A, there is  
225 substantial heterogeneity in penetrance across traditionally labelled ‘hot spot’ regions in Kv7.1,  
226 including the pore domain, voltage sensing domains, and subunit assembly domains (Figure 6A  
227 and 6B)<sup>26</sup>. Whereas several variants in these ‘hot spot’ domains are observed to have high  
228 posterior estimates, as indicated by the color and thickness of the putty rendering, there remain  
229 several residues with comparatively low penetrance within the same domain. Interestingly, we  
230 observe enriched penetrance across the known binding site of calmodulin (Figure 6C)<sup>27</sup>. For  
231 example, surface residues on two helices in contact with calmodulin both have high penetrance  
232 estimates, including p.Trp379 (3 observed variants, 4 of 5 heterozygotes affected) and  
233 p.Met520Arg (4 of 4 heterozygotes affected). Structural comparisons revealed that the Kv7.1  
234 S5-S6 domain have higher penetrance estimates than those of Kv11.1. We observe that the  
235 high pathogenicity of variants in the S5 helix continues into the S6 helix of Kv7.1 (p.Ala344Val,  
236 17 of 20 heterozygotes affected; p.Gly345Arg, 2 of 2 heterozygotes affected; p.Leu353Pro, 8/8  
237 heterozygotes affected), whereas those for Kv11.1 rapidly taper (residue p.Met645 – 4 unique  
238 variants – 9/10 heterozygotes affected; p.Ser660Leu, 2/7 heterozygotes affected). This finding  
239 is consistent with a recent report implicating variants in the Kv7.1 S6 domain as particularly  
240 pathogenic, causing a significant decrease in event-free survival<sup>28</sup>. This may be structurally  
241 rationalized by the greater sensitivity of flexible motifs within the Kv7.1 S6 helix including the  
242 ‘GSG’ motif<sup>29</sup> (p.Ser349Trp, 2 of 2 heterozygotes affected, and p.Gly350, 3 variants, 9 of 9  
243 heterozygotes affected).

244

245 We next mapped Bayesian posteriors for BrS and LQT3 onto the structure of *SCN5A* (Figure 7A  
246 and 7B). The BrS posterior estimates were highest in the pore region, especially near the  
247 selectivity filter, with some additionally high penetrance variants in the voltage sensing domains  
248 (VSDs) and the C-terminal EF-hand domain; however, even in the highly conserved pore  
249 helices, there were several BrS low-penetrance residues. These results contrast with  
250 penetrance estimates for LQT3, where high penetrance residues were concentrated in and near  
251 the inactivation gate on the intracellular side of the channel. While some domains are  
252 associated with both phenotypes (such as the C-terminal EF-hand domain), other regions of  
253  $Na_v1.5$  are exclusively linked to BrS or LQT3 (VSD and pore for BrS and inactivation gate for  
254 LQT3). For example, of the 164 heterozygotes for the variant p.Glu1784Lys, we observed 31  
255 with BrS and 114 with LQT3 (posterior estimates 0.19 and 0.69, respectively). This variant is in  
256 the C-terminus of the S6 helix, and recent structural studies have implicated its role in fast  
257 inactivation<sup>30</sup>. In contrast, the in-frame deletion p.Gln1507-1509del in the domain III-domain IV  
258 linker (inactivation-gate) was LQT3 specific (85 of 87 heterozygotes LQT3 affected, 0 BrS). Our  
259 highest BrS posterior estimate was for the variant p.Arg878Cys (32 of 36 heterozygotes  
260 affected) in the domain II pore.

261

262

## 263 Discussion

264 *Bayesian Penetrance Estimates for Mendelian Arrhythmias.* We applied a probabilistic model to  
265 generate prior and posterior penetrance estimates for the *KCNQ1-LQT1* and *SCN5A-LQT3*  
266 genotype-phenotype pairs that explicitly account for incomplete penetrance in the model  
267 framework. Functional, *in silico*, and structural features of these channels were significantly  
268 associated with LQT1 and LQT3 penetrance. We found that these models carried information  
269 equivalent to 10 and 5 heterozygote clinical observations, respectively. The *KCNQ1-LQT1*  
270 model had a Bayesian prior 10-fold cross-validated Brier scores of 0.032, indicating excellent  
271 probabilistic forecasting. We then analyzed the distributions of penetrance estimates for four  
272 genotype-phenotype pairs and found *KCNQ1-LQT1* had the largest fraction of variants with high  
273 estimated penetrance (Figure 5E). These continuous estimates were then mapped onto each  
274 protein structure, which revealed a structural basis of these findings as well as significant  
275 heterogeneity in traditionally annotated 'hot spot' domains. We curated these data and host  
276 them in a convenient format for research and prospective clinical management.

277

278 *Variable Penetrance Among Genotype-Phenotype Pairs.* Incomplete penetrance is observed  
279 even among highly deleterious variants. For example, the *KCNQ1* variant p.Ala341Val has  
280 sharply decreased event-free survival compared to other *KCNQ1* missense variants<sup>28</sup>, but still  
281 provokes the phenotype incompletely (301 of 375 heterozygotes manifest LQT1). Extended to  
282 all variants observed in at least one heterozygote, Figure 4 shows penetrance estimates for  
283 relatively few variants exhibit >90% penetrance (quantified in Figure 4E) and a bimodal  
284 distribution for LQT1 and LQT2 penetrance, a loosely bimodal distribution for BrS, and a taper  
285 for LQT3. The fraction of significantly high penetrance variants is consistent with the fraction of  
286 LQTS cases attributed to variants in these genes: roughly 50% of LQTS cases are attributable

287 to variants in *KCNQ1*, 40% in *KCNH2* and 10% in *SCN5A*<sup>31</sup>. This trend inversely correlates with  
288 gene size: (K<sub>v</sub>7.1 676 amino acids, K<sub>v</sub>11.1 1159 amino acids, and Nav1.5 2016 amino acids).  
289 For BrS and LQT3, more variants can confer loss-of-function for BrS, compared to the more  
290 limited set of possible variants that could induce a 'gain-of-function' phenotype associated with  
291 LQT3. This difference may explain the relative decrease in precision of the *SCN5A*-LQT3  
292 estimates reflected in the lower number of phenotype observations compared to *KCNQ1*-LQT1  
293 (5 vs 10). The predictive features are comparatively weaker due to the bias to estimate loss-of-  
294 function rather than gain-of-function as a single score. Compared to LQT1 and LQT2, BrS (also  
295 associated with loss-of-function) penetrance distribution has a lower fraction of variants with  
296 penetrance >0.5, likely due to contributions to the phenotype from other genes or polygenic  
297 modifiers (Figure 5E). This is consistent with recent suggestions of the oligogenic nature of BrS  
298 as compared to more strictly Mendelian LQT1-3 with polygenic modifiers<sup>32</sup>. The complication of  
299 both arrhythmia-associated gain-of-function and loss-of-function phenotypes for missense  
300 variants in *SCN5A* likely contributes to the worse correlation between *SCN5A* predictive  
301 features and LQT3 penetrance leading to lower hypothetical heterozygote count for *SCN5A*-  
302 LQT3.

303

304 *Continuous Bayesian Penetrance Provides Higher Resolution Variant Interpretation.* The ACMG  
305 variant classification scheme is a clinically useful categorical framework to interpret variants<sup>4</sup>.  
306 While this approach enables convenient approximations for clinical decision making, variants  
307 within each of these categories may nevertheless exert divergent risk due to incomplete  
308 penetrance. The *KCNQ1* variant p.Val254Met has not been observed in gnomAD and is  
309 associated with a high frequency of sudden cardiac death and syncope in Japanese  
310 heterozygotes<sup>33</sup>. From variant-specific features alone, we obtained a penetrance estimate of  
311 0.65 and a posterior LQT1 penetrance estimate of 0.84. In contrast, the disease-associated

312 variant p.Gly589Asp has a higher allele-frequency ( $4.96e-5$  in gnomAD) than expected for a  
313 highly pathogenic variant ( $2.5e-5$  rare allele cutoff<sup>34</sup>), despite being annotated as Pathogenic in  
314 ClinVar<sup>5</sup>. Accordingly, our model predicted a prior penetrance estimate of 0.37, and a posterior  
315 estimate of 0.23 after incorporating clinical data (8 of 40 affected heterozygotes). Such a variant  
316 clearly carries risk above the baseline population rate, but not as high as that conferred by  
317 p.Val254Met. A strength of our approach is therefore the ability to capture this granular level of  
318 detail, whereas classification methods lose this nuance. Our continuous estimates suggest that  
319 certain variants may be considered ‘modifiers’ or exert subtle impact, consistent with the  
320 terminology of “LQT-lite” proposed by Ackerman and colleagues<sup>35-37</sup>. This idea is additionally  
321 consistent with recent work showing variable environment interactions in the presence of  
322 common *SCN5A* variants, where the variant may act as a ‘modifier’ of penetrance<sup>38</sup>.

323

324 The divergence of our approach, leveraging information contained within the variant-specific  
325 features, can also be appreciated when contrasted with ClinVar categorical descriptions (Figure  
326 5). ClinVar annotated P/LP variants display a range of predicted penetrance estimates (0.167-  
327 0.903 *KCNQ1* and 0.0930-0.945 *KCNH2*); the effect is also evident from non-Bayesian  
328 penetrance observations (Figure 5A and 5C). Furthermore, our findings in Figure 4A show that  
329 observed penetrance is not sufficient for forecasting penetrance, that most unique variants are  
330 observed in very few people leading to too many LQTS penetrance estimates of 0 or 1. Variant-  
331 specific features modify these crude estimates from low numbers of phenotyped variants to shift  
332 estimates away from the extremes to more intuitive and biologically reasonable estimates  
333 (Figure 4B). Collectively, these observations support the notion that our continuous Bayesian  
334 estimates offer a higher resolution alternative to categorical classification.

335



336 *Penetrance Heterogeneity within Structured Functional Domains.* Previous works have  
337 implicated 'hot spot' regions within the three protein products based on collapsing of variants in  
338 cases and controls; however, many of these studies preceded recent large-scale population  
339 genome sequencing efforts<sup>26,39</sup>. Our combination of genetic and structural data shows variable  
340 penetrance throughout many traditional 'hot spot' domains (Figure 6 and 7). For example, not all  
341 residues in the *SCN5A* domain IV VSD or pore are associated with high BrS penetrance (Figure  
342 6A). These differences are further rationalized between the *SCN5A*-BrS and *SCN5A*-LQT3  
343 pairs, where different electrophysiological parameters correspond to discrete structural features.  
344 Even for higher penetrance variants within 'hot spots', many provoke the phenotype  
345 incompletely. In *KCNH2*, the ClinVar Pathogenic variant p.Val822Met is located in the pore  
346 domain 'hot spot' but affects only 27 of 42 heterozygotes with a Bayesian penetrance estimate  
347 of 0.65. We also observe heterogeneity between homologous S6 segments in *Kv7.1* and  
348 *Kv11.1*, with a much higher LQTS penetrance throughout the helix in the former. These results  
349 highlight important structural differences in these proteins that contribute to clinical penetrance,  
350 despite similar channel characteristics (both being voltage-gated potassium channels).  
351 Altogether, these data suggest using variant location in 'hot spot' domains in ACMG variant  
352 classifications may be premature<sup>40</sup>. For instance, recent work from our lab performed a Deep  
353 Mutational Scan of a 'hot spot' exon in *KCNH2*, and found experimentally that only 42% of all  
354 possible amino acid substitutions substantially decreased trafficking<sup>41</sup>. We view the current  
355 approach as providing higher resolution interpretation in these domains – this work provides  
356 more information than categorical classification, or yes/no 'hot spot' annotations.

357

358 Mapping penetrance to structure also provides unique insights into the underlying channel  
359 biology. For example, *Kv7.1* residues 364-383 and 510-533 form the A and B helices,  
360 respectively, with several high-penetrance sites, including non-buried residues which interact

361 with calmodulin (Figure 6C). Calmodulin is global calcium sensor within the cardiomyocyte and  
362 is important for regulating excitation-contraction coupling<sup>42</sup>. The functional implications of  
363 Calmodulin binding  $K_v7.1$  are speculative, however, a recent study implicated calmodulin as a  
364 state-dependent switch to modulate channel gating<sup>43</sup>. Our study suggests a high LQT1  
365 penetrance when these interactions are abrogated by genetic variation, likely being mediated  
366 through this loss of gating modulation. These results provide a complementary set of data to  
367 implicate loss of the Calmodulin- $K_v7.1$  signaling axis as an etiology for LQT1.

368  
369 *Comparison with Other Approaches.* Recent studies in the cardiac space have leveraged  
370 machine learning to facilitate variant reclassification<sup>15,16</sup>. Approaches such as GENESIS<sup>16</sup> and  
371 MLb-LDLr<sup>15</sup> make progress towards this goal but rely on ClinVar data as a critical input. The  
372 approach we take relies on classic regression strategies and expectation-maximization to  
373 integrate data, and instead draws on all available variant-specific features to output a  
374 *continuous* penetrance estimate calibrated to curated, granular clinical data. Rather than  
375 focusing on classification, other interesting approaches have instead focused primarily on  
376 functional impact, such as prediction of functional properties in the presence of missense  
377 variants<sup>44,45</sup>. The use of granular clinical data, each heterozygote evaluated as above or below a  
378 clinically meaningful threshold represents an advance by which we can assert not only a  
379 penetrance estimate, but also the uncertainty of the estimate – an approach well-tailored to  
380 incompletely penetrant BrS and LQTS variants.

381  
382 *Precision Medicine Applications.* An increasingly important goal of precision medicine is to  
383 enable ‘genetics first approaches’, wherein sequencing of unascertained clinical cohorts may  
384 prioritize individuals for tailored follow-up<sup>46,47</sup>; however, prioritizing variant heterozygotes for  
385 follow up remains difficult. Additionally, sequencing of large population cohorts has revealed an

386 unexpectedly large frequency of missense variants in genes associated with Mendelian  
387 disease<sup>19,48,49</sup>. It is unlikely there will ever be sufficient discovered heterozygotes for clinical  
388 phenotyping to adjudicate the clinical consequence of all possible single nucleotide variants in  
389 Mendelian disease genes<sup>50</sup>. It is therefore imperative to maximally leverage all variant-specific  
390 features to help facilitate an understanding of clinical consequence<sup>51</sup>. As many phenotypes  
391 demonstrate variable penetrance, our method provides an initial gestalt from variant-specific  
392 features which help tailor prospective precision medicine in concert with other clinical  
393 observations. To calibrate the strength of these features, we provide an empirical equivalent of  
394 heterozygote observations, an interpretable form of these data. Based on this progress, we  
395 envision a future in which genetic testing forms a pre-test probability of disease which is  
396 updated by clinical phenotyping. This schematic would represent an inversion of the current use  
397 of genetics in medical practice, in which a genetic test most commonly modifies a clinical pre-  
398 test probability.

399  
400 *Limitations.* One limitation of our study is the ascertainment bias of highly penetrant variants in  
401 clinical practice. Many asymptomatic heterozygotes will not be clinically phenotyped or  
402 adequately sampled in current population sequencing studies. This bias is additionally reflected  
403 in the availability of functional data, as most studies have interrogated variants with a high  
404 suspicion of pathogenicity; however, this bias is increasingly tempered by functional evaluation  
405 of less unascertained variants such as those in a recent study of arrhythmia genes in the  
406 eMERGE network<sup>52</sup>. We are currently unable to satisfactorily account for variant combinations  
407 such as compound heterozygotes<sup>53</sup>. Data availability remains a limitation for model construction,  
408 as several ClinVar annotations were based off 'personal communications' which resulted in low  
409 or zero observed penetrance among P/LP variants in select cases.

410

411 **Conclusion**

412 Incomplete penetrance demands nuance to variant interpretation for the realization of genome-  
413 first precision medicine approaches<sup>46</sup>. We make progress towards this goal by elaborating a  
414 probabilistic approach that considers each variant as having a continuous penetrance  
415 probability and provides higher resolution in 'hot spot' domains to facilitate prospective clinical  
416 management. This approach provides more information than classification and explicitly treats  
417 incomplete penetrance in model construction. We render variant-specific features as  
418 equivalents to clinically-phenotyped heterozygotes to democratize these data to a broader  
419 audience without electrophysiology and structural biology expertise.

420

## 421 **Description of Supplemental Data**

422 We have included all referenced supplemental figures and tables (Supplemental Figures 1-3  
423 and Supplemental Table 1), as well as a detailed description of the penetrance estimation  
424 protocol in the Supplemental Methods section.

## 425 **Declaration of Interests**

426 The authors declare no competing interests.

## 427 **Ethics Declaration**

428 Institutional Review Board (#191563) of Vanderbilt University Medical Center granted a waiver  
429 for this work based on 45 CFR 46.104 (d) category (4) for Exempt Review.

## 430 **Acknowledgements**

431 This research was funded by American Heart Association 907581 (MJO), a Marie Skłodowska-  
432 Curie Individual Fellowship (H2020-MSCA-IF-2017; Grant Agreement No. 795209, LS), a  
433 Fondazione CARIPLO, “Biomedical Research Conducted by Young Researchers” (Grant No.  
434 2019-1691, LS), NIH R01HL160863 (BMR), American Heart Association 848898, Leducq  
435 Foundation for Cardiovascular Research grant 18CVD05 (LC, JES, PJS, BMR), and partially  
436 supported by the Italian Ministry of Health (LS, LC, FD, MCK, CS, PJS). Also, we are grateful to  
437 Drs. Silvia Castelletti and Sabrina Bedogni for their help in the initial data collection.

## 438 **Web Resources**

439 OMIM, <http://www.omim.org/>

440 RCSB Protein Data Bank, <http://www.rcsb.org/pdb/home/home.do/>

441 Variant Browser, <https://variantbrowser.org/>

## 442 **Data and Code Availability**

443 All code used to generate the results are available at <https://github.com/kroncke-lab>.

444 **Author Contributions**

445 Conceptualization: MJO, BMK; Data curation: MJO, LS, ID, YW, KK, LC, FD, MCK, CS, AL, JES,  
446 AK, SO, MH, FE, PJS, BMK; Formal Analysis: MJO, LS, ID, YW, KK, RT, DMR, MH, FE, PSJ,  
447 BMK; Supervision: BMK; Visualization: MJO, BMK; Writing-original draft: MJO, BMK; Writing-  
448 review & editing: MJO, LS, ID, YW, KK, LC, MCK, CS, AL, JES, AK, SO, RT, DMR, MH, FE, PJS,  
449 BMK.

450

451

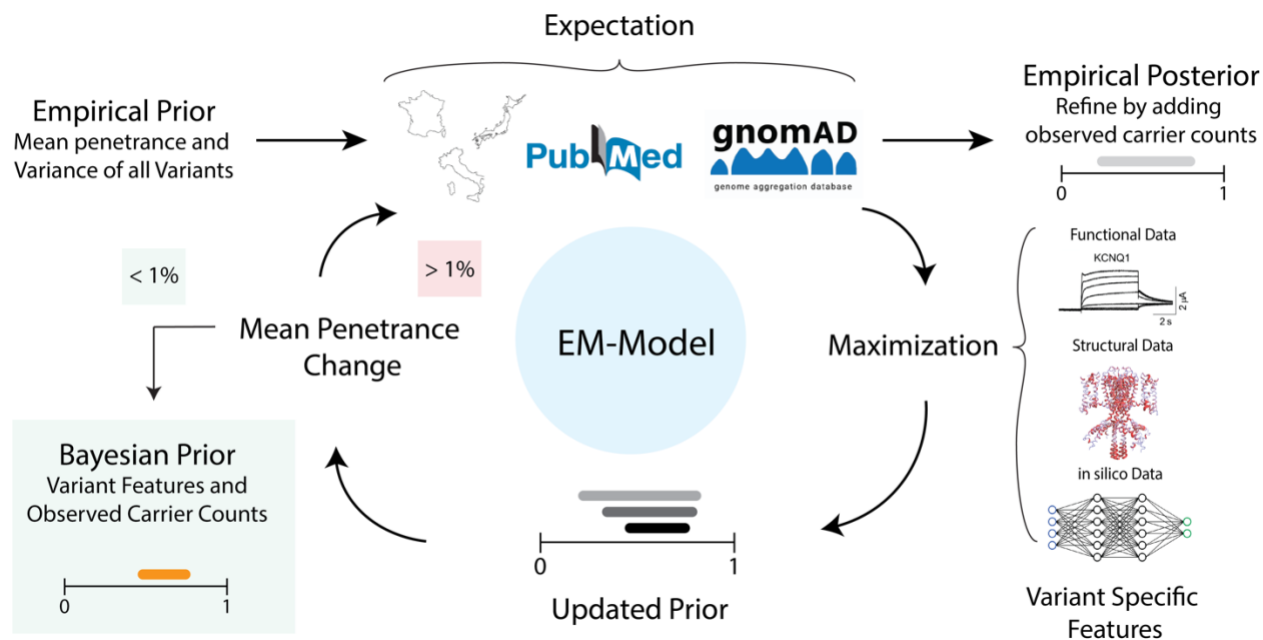

452

453

454 **Figure 1. Schematic of Bayesian approach**

455 An empirical prior is derived from the average penetrance and variance of all variants. We add  
 456 variant specific counts to derive an empirical posterior for each variant. Within the context of an  
 457 Expectation-Maximization model, we update the empirical posterior with variant specific  
 458 features. This provides an updated prior, which is further iterated with clinical data and variant  
 459 specific features until the penetrance does not continue to change. This outputs a Bayesian  
 460 prior used in future analyses.

461

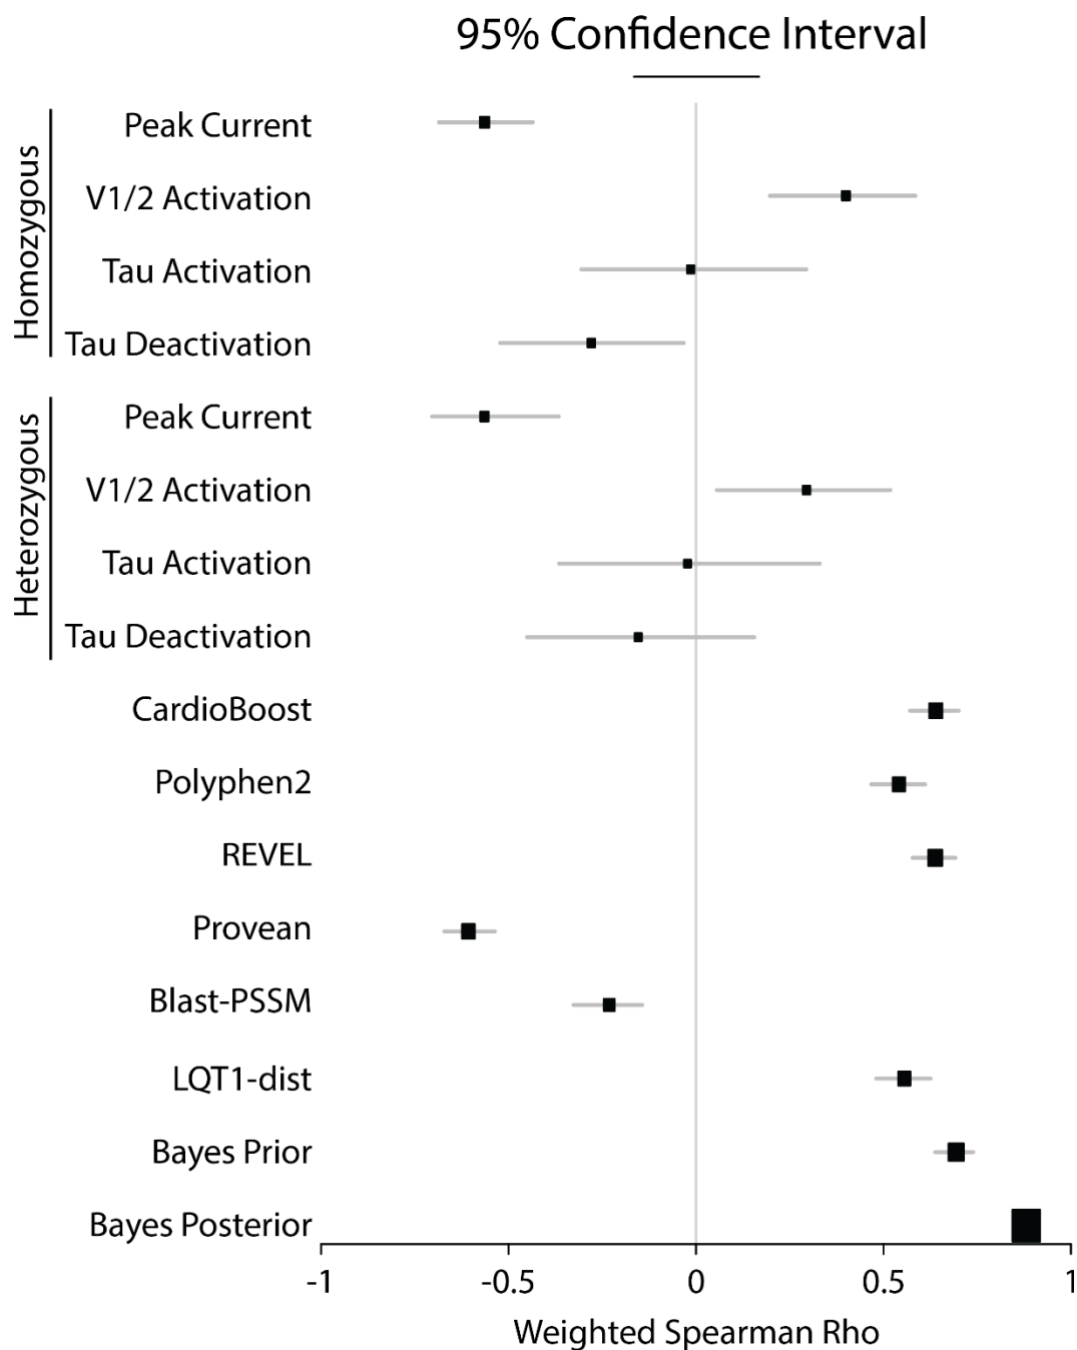

462

463

464 **Figure 2. LQT1 Bayesian Model Covariate Evaluation**

465 Weighted Spearman Rho correlations and 95% confidence intervals for each covariate against

466 LQT1 empirical penetrance.

467



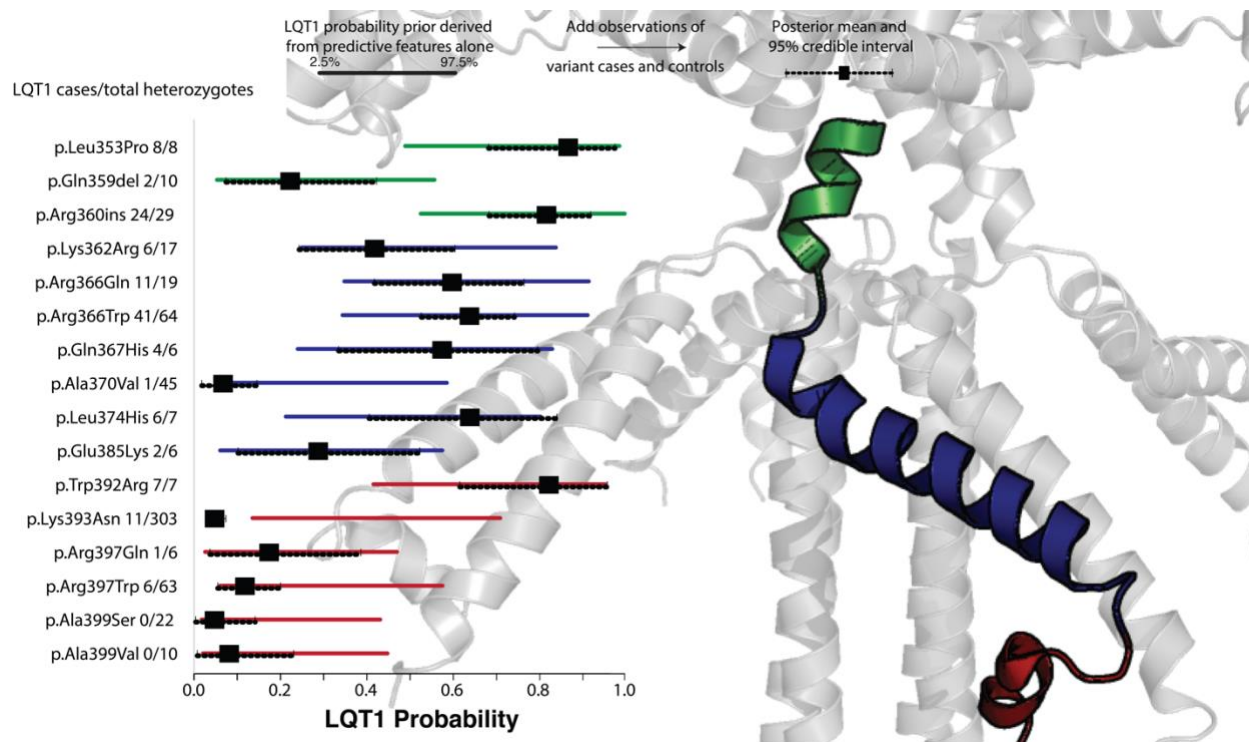

468

### 469 Figure 3. LQT1 Penetrance Estimate Forest Plots and Structure

470 Depiction of prior and posterior penetrance estimates for residues 350-400 (S6 transmembrane  
471 segment into the C-terminus) with >5 carriers. The prior penetrance estimates and 95% credible  
472 interval are depicted in gold, with the posterior and updated 95% credible intervals in black.

473 Total number of observed heterozygotes are given. 95% credible interval changes proportionally  
474 with the number of clinical observations.

475

476

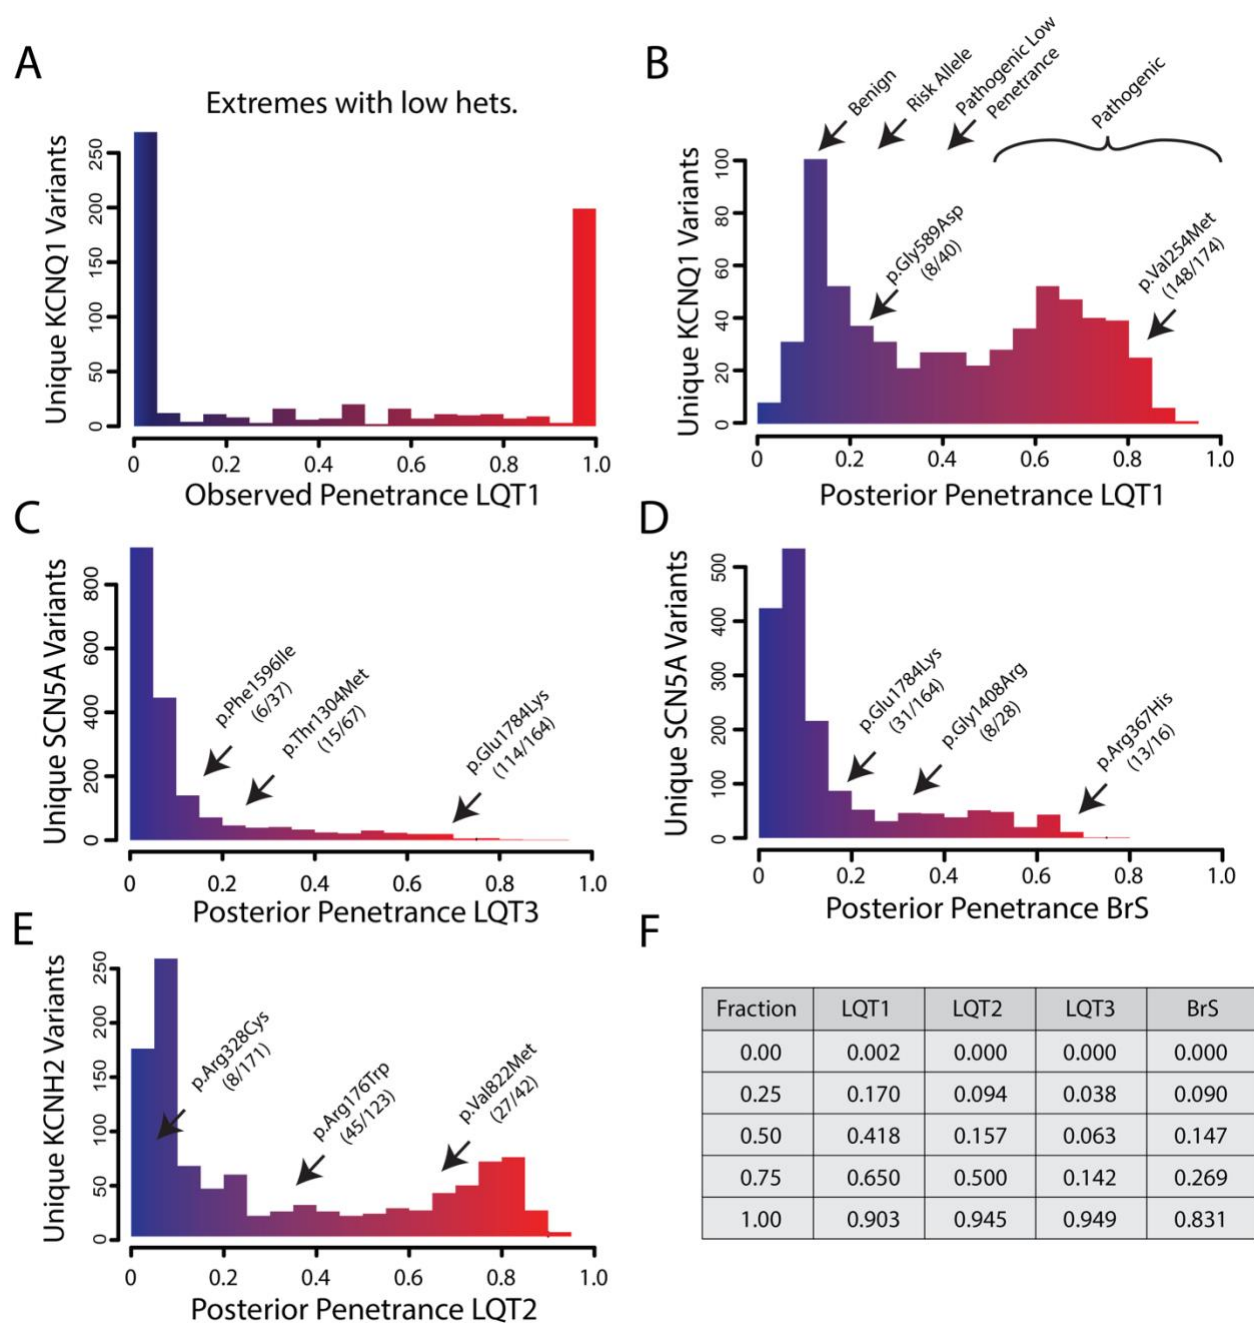

477

478 **Figure 4. Histograms of Variant Penetrance in 4 Mendelian Channelopathies**

479 A) Observed penetrance frequencies for *KCNQ1*-LQT1 variants. Note bimodal distribution of  
 480 penetrance frequencies in the observed penetrance.

481 B) Frequencies of Bayesian posterior penetrance estimates for *KCNQ1*-LQT1. Labels indicate  
 482 clinical 'gestalts' for different ranges of penetrance fractions to map ACMG classifications.

483 C) Bayesian posterior frequencies for *SCN5A*-LQT3. This distribution has the lowest penetrance  
484 estimates with few very highly penetrant variants.

485 D) Bayesian posterior frequencies for *SCN5A*-BrS. Covariates predict a more left-skewed  
486 distribution with a mild bimodal distribution. The highest decile of observations has less  
487 penetrance than those of LQT1 and LQT2.

488 E) Bayesian posterior frequencies for *KCNH2*-LQT2. Bimodal distribution of penetrance  
489 frequencies.

490 F) Quantile table of distributions of posterior penetrance fractions for each genotype-phenotype  
491 pair.

492

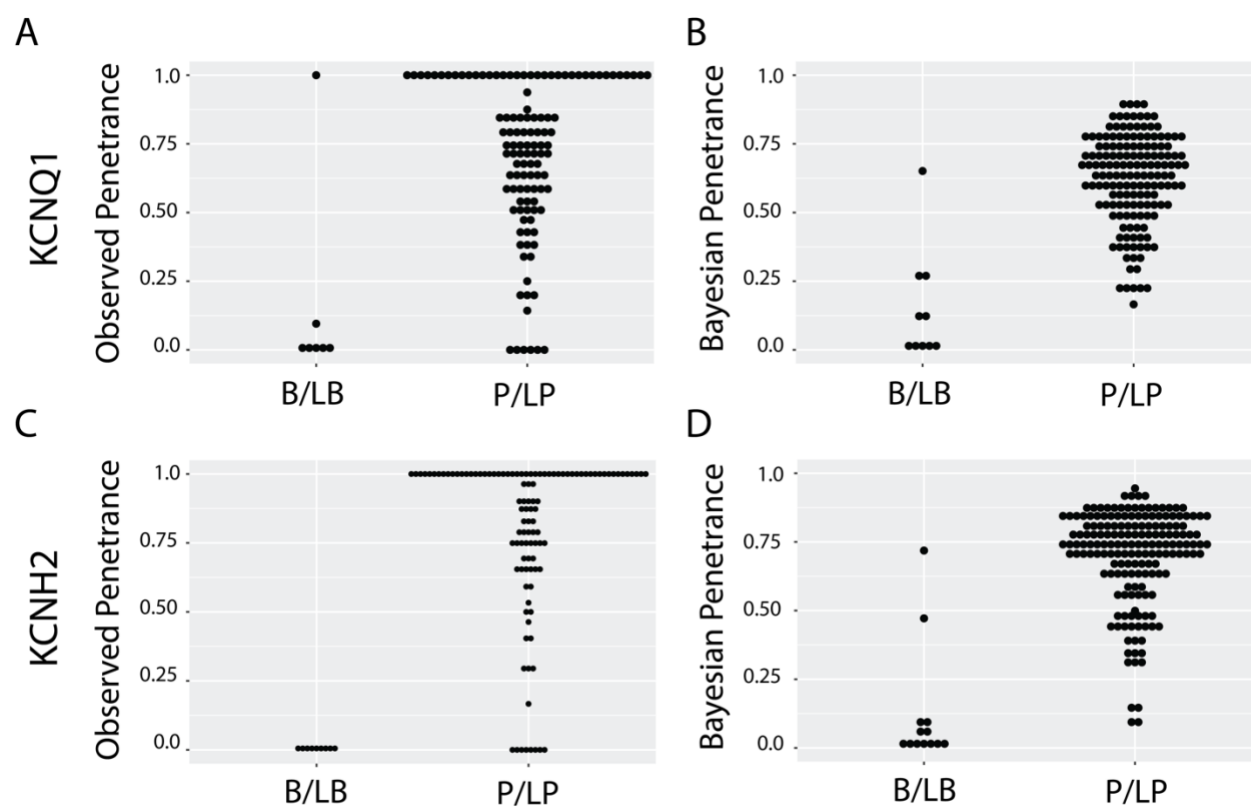

493

494 **Figure 5. Bayesian and Observed Penetrance Associated with ClinVar Annotations.**

495 A) Plotting the observed penetrance by ClinVar category shows that many *KCNQ1* P/LP  
496 variants are incompletely penetrant.

497 B) Most ClinVar Benign and Likely Benign *KCNQ1* variants have low Bayesian penetrance  
498 estimates. Notably, Pathogenic and Likely Pathogenic variants have a wide distribution of  
499 Bayesian penetrance.

500 C) P/LP *KCNH2* variants have a wide distribution of Bayesian penetrance scores in our model.

501 D) Several ClinVar P/LP variants within *KCNH2* are incompletely penetrant.

502

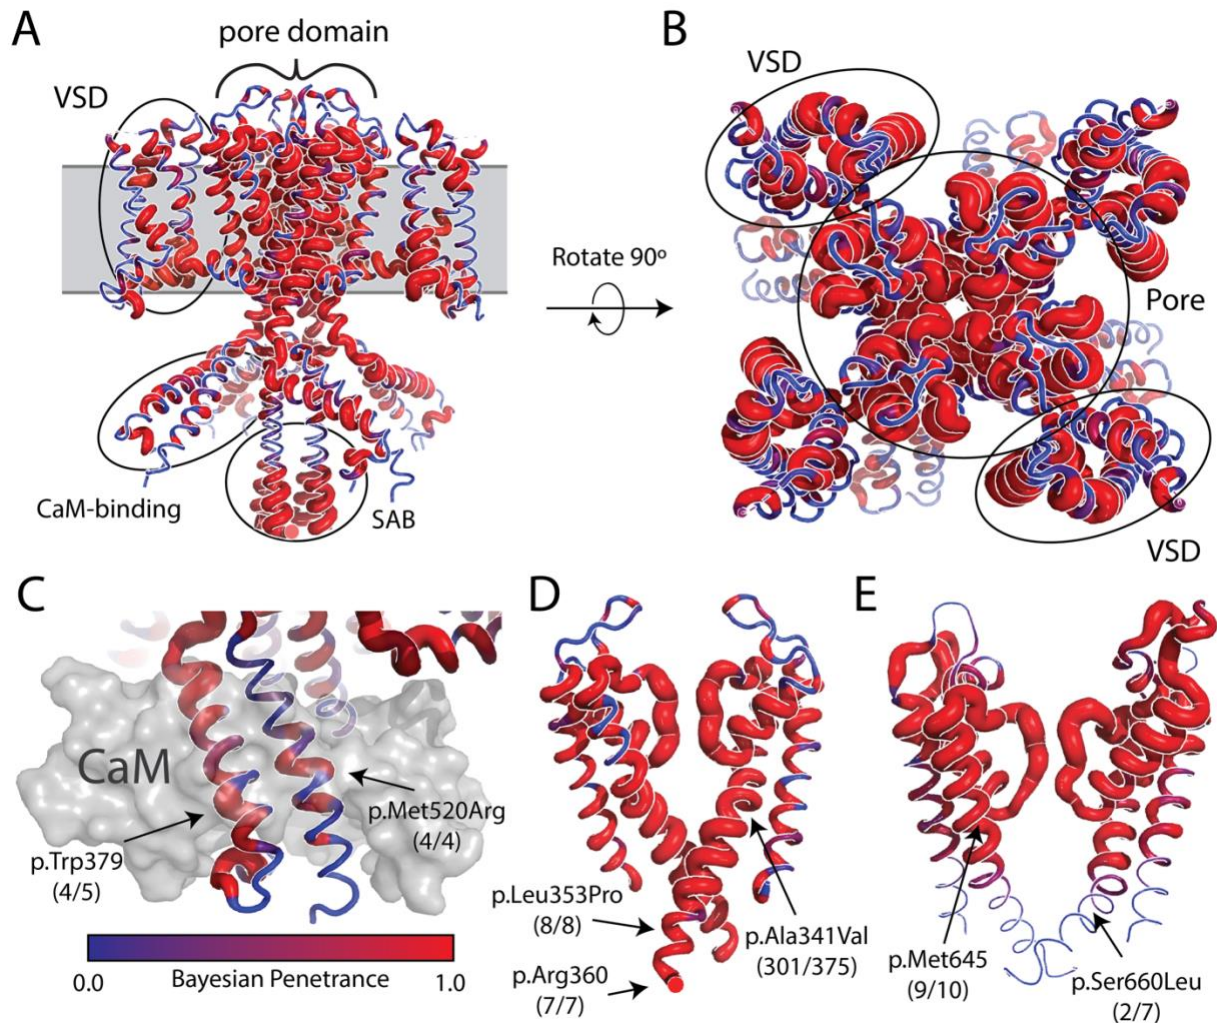

503

504 **Figure 6. Structural Basis of *KCNQ1-LQT1* Penetrance and ‘Hot-Spot’ Domain**  
505 **Heterogeneity**

506 A) Posterior penetrance estimates imposed upon the tetrameric experimental K<sub>v</sub>7.1 structure.

507 The subassembly domain (SAB) and pore domain have a high degree of penetrance.

508 Calmodulin (CaM) binding domains and Voltage Sensing Domains (VSD) also exhibit high,

509 although heterogenous, penetrance.

510 B) View of channel embedded in membrane from extracellular perspective. We observe very

511 high penetrance in the channel pore and along VSD.

512 C) Close up of calmodulin binding domain with experimentally observed Calmodulin binding.

513 Residues with high contact show enlarged penetrance estimates.

514 D) K<sub>v</sub>7.1 S5-S6 helices with nearly uniform high penetrance estimates. Example variants

515 provided.

516 E) K<sub>v</sub>11.1 S5-S6 helices. Penetrance tapers along the S6 transmembrane domain compared to

517 that observed for K<sub>v</sub>7.1.

518

519

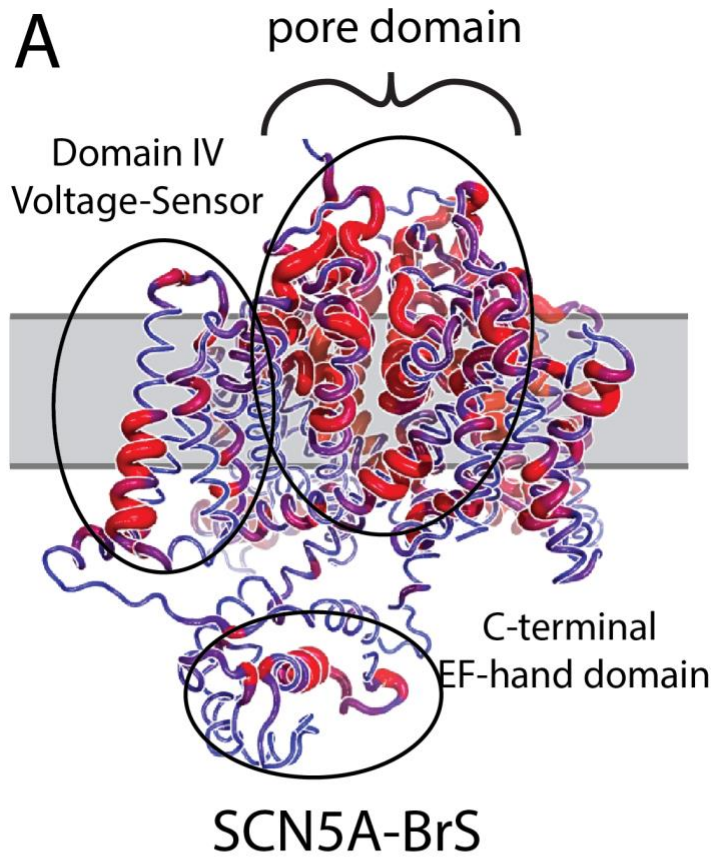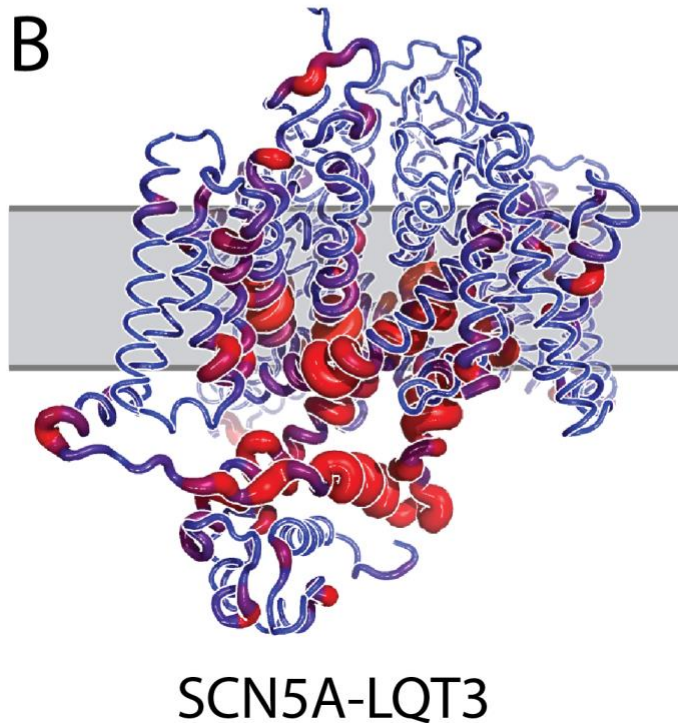

520

521 **Figure 7. Structural heterogeneity of BrS and LQT3 penetrance**

522 A) Bayesian posterior estimates for *SCN5A*-BrS. High degree of penetrance along the channel  
523 pore and voltage sensing domain (VSD).

524 B) Bayesian posterior estimates for *SCN5A*-LQT3. Fewer residues show high penetrance for  
525 LQT3 compared to BrS, consistent with the molecular defects precipitating each disease. Some  
526 overlap is observed in the C-terminal EF Hand domain, whereas variants in the pore are highly  
527 tolerated compared to BrS.

528



529 **Table 1.** Brier Scores for KCNQ1-LQT1 Model.

| <b>Covariate</b>   | <b>Brier Score</b> |
|--------------------|--------------------|
| CardioBoost        | 0.19               |
| Polyphen2          | 0.22               |
| REVEL (unadjusted) | 0.17               |
| LQT1-Dist          | 0.062              |
| Bayesian Prior     | 0.028              |
| Bayesian Posterior | 0.010              |

530

531

532 **References**

533

- 534 1 Wright, C. F. *et al.* Assessing the Pathogenicity, Penetrance, and Expressivity of Putative  
535 Disease-Causing Variants in a Population Setting. *Am J Hum Genet* **104**, 275-286 (2019).  
536 <https://doi.org/10.1016/j.ajhg.2018.12.015>
- 537 2 McClellan, J. & King, M. C. Genetic heterogeneity in human disease. *Cell* **141**, 210-217  
538 (2010). <https://doi.org/10.1016/j.cell.2010.03.032>
- 539 3 Cooper, D. N., Krawczak, M., Polychronakos, C., Tyler-Smith, C. & Kehrer-Sawatzki, H.  
540 Where genotype is not predictive of phenotype: towards an understanding of the  
541 molecular basis of reduced penetrance in human inherited disease. *Hum Genet* **132**, 1077-  
542 1130 (2013). <https://doi.org/10.1007/s00439-013-1331-2>
- 543 4 Richards, S. *et al.* Standards and guidelines for the interpretation of sequence variants: a  
544 joint consensus recommendation of the American College of Medical Genetics and  
545 Genomics and the Association for Molecular Pathology. *Genet Med* **17**, 405-424 (2015).  
546 <https://doi.org/10.1038/gim.2015.30>
- 547 5 Landrum, M. J. *et al.* ClinVar: public archive of relationships among sequence variation  
548 and human phenotype. *Nucleic Acids Res* **42**, D980-985 (2014).  
549 <https://doi.org/10.1093/nar/gkt1113>
- 550 6 Schwartz, P. J. *et al.* Inherited cardiac arrhythmias. *Nat Rev Dis Primers* **6**, 58 (2020).  
551 <https://doi.org/10.1038/s41572-020-0188-7>
- 552 7 Hosseini, S. M. *et al.* Reappraisal of Reported Genes for Sudden Arrhythmic Death:  
553 Evidence-Based Evaluation of Gene Validity for Brugada Syndrome. *Circulation* **138**, 1195-  
554 1205 (2018). <https://doi.org/10.1161/circulationaha.118.035070>
- 555 8 Adler, A. *et al.* An International, Multicentered, Evidence-Based Reappraisal of Genes  
556 Reported to Cause Congenital Long QT Syndrome. *Circulation* **141**, 418-428 (2020).  
557 <https://doi.org/10.1161/CIRCULATIONAHA.119.043132>
- 558 9 Priori, S. G., Napolitano, C. & Schwartz, P. J. Low penetrance in the long-QT syndrome:  
559 clinical impact. *Circulation* **99**, 529-533 (1999). <https://doi.org/10.1161/01.cir.99.4.529>
- 560 10 Lahrouchi, N. *et al.* Transethnic Genome-Wide Association Study Provides Insights in the  
561 Genetic Architecture and Heritability of Long QT Syndrome. *Circulation* **142**, 324-338  
562 (2020). <https://doi.org/10.1161/circulationaha.120.045956>
- 563 11 Wijeyeratne, Y. D. *et al.* SCN5A Mutation Type and a Genetic Risk Score Associate Variably  
564 With Brugada Syndrome Phenotype in SCN5A Families. *Circ Genom Precis Med* **13**,  
565 e002911 (2020). <https://doi.org/10.1161/circgen.120.002911>
- 566 12 Nauffal, V. *et al.* Monogenic and Polygenic Contributions to QTc Prolongation in the  
567 Population. *medRxiv*, 2021.2006.2018.21258578 (2021).  
568 <https://doi.org/10.1101/2021.06.18.21258578>
- 569 13 van Rees, J. B. *et al.* Inappropriate implantable cardioverter-defibrillator shocks:  
570 incidence, predictors, and impact on mortality. *J Am Coll Cardiol* **57**, 556-562 (2011).  
571 <https://doi.org/10.1016/j.jacc.2010.06.059>

- 572 14 Schwartz, P. J. *et al.* Who are the long-QT syndrome patients who receive an implantable  
573 cardioverter-defibrillator and what happens to them?: data from the European Long-QT  
574 Syndrome Implantable Cardioverter-Defibrillator (LQTS ICD) Registry. *Circulation* **122**,  
575 1272-1282 (2010). <https://doi.org/10.1161/circulationaha.110.950147>
- 576 15 Larrea-Sebal, A. *et al.* MLb-LDLr: A Machine Learning Model for Predicting the  
577 Pathogenicity of LDLr Missense Variants. *JACC Basic Transl Sci* **6**, 815-827 (2021).  
578 <https://doi.org/10.1016/j.jacbts.2021.08.009>
- 579 16 Draelos, R. L. *et al.* GENESIS: Gene-Specific Machine Learning Models for Variants of  
580 Uncertain Significance Found in Catecholaminergic Polymorphic Ventricular Tachycardia  
581 and Long QT Syndrome-Associated Genes. *Circ Arrhythm Electrophysiol*,  
582 101161circep121010326 (2022). <https://doi.org/10.1161/circep.121.010326>
- 583 17 Kozek, K. *et al.* Estimating the Post-Test Probability of Long QT Syndrome Diagnosis for  
584 Rare KCNH2 Variants. *Circ Genom Precis Med* (2021).  
585 <https://doi.org/10.1161/circgen.120.003289>
- 586 18 Kroncke, B. M. *et al.* A Bayesian method to estimate variant-induced disease penetrance.  
587 *PLoS Genet* **16**, e1008862 (2020). <https://doi.org/10.1371/journal.pgen.1008862>
- 588 19 Karczewski, K. J. *et al.* The mutational constraint spectrum quantified from variation in  
589 141,456 humans. *Nature* **581**, 434-443 (2020). [https://doi.org/10.1038/s41586-020-](https://doi.org/10.1038/s41586-020-2308-7)  
590 [2308-7](https://doi.org/10.1038/s41586-020-2308-7)
- 591 20 Kroncke, B. M. *et al.* Protein structure aids predicting functional perturbation of missense  
592 variants in SCN5A and KCNQ1. *Comput Struct Biotechnol J* **17**, 206-214 (2019).  
593 <https://doi.org/10.1016/j.csbj.2019.01.008>
- 594 21 Zhang, X. *et al.* Disease-specific variant pathogenicity prediction significantly improves  
595 variant interpretation in inherited cardiac conditions. *Genet Med* **23**, 69-79 (2021).  
596 <https://doi.org/10.1038/s41436-020-00972-3>
- 597 22 Ioannidis, N. M. *et al.* REVEL: An Ensemble Method for Predicting the Pathogenicity of  
598 Rare Missense Variants. *Am J Hum Genet* **99**, 877-885 (2016).  
599 <https://doi.org/10.1016/j.ajhg.2016.08.016>
- 600 23 Choi, Y. & Chan, A. P. PROVEAN web server: a tool to predict the functional effect of amino  
601 acid substitutions and indels. *Bioinformatics* **31**, 2745-2747 (2015).  
602 <https://doi.org/10.1093/bioinformatics/btv195>
- 603 24 BRIER, G. W. VERIFICATION OF FORECASTS EXPRESSED IN TERMS OF PROBABILITY.  
604 *Monthly Weather Review* **78**, 1-3 (1950). [https://doi.org/10.1175/1520-](https://doi.org/10.1175/1520-0493(1950)078<0001:vofeit>2.0.co;2)  
605 [0493\(1950\)078<0001:vofeit>2.0.co;2](https://doi.org/10.1175/1520-0493(1950)078<0001:vofeit>2.0.co;2)
- 606 25 Wilde, A. A. M. & Amin, A. S. Clinical Spectrum of SCN5A Mutations: Long QT Syndrome,  
607 Brugada Syndrome, and Cardiomyopathy. *JACC Clin Electrophysiol* **4**, 569-579 (2018).  
608 <https://doi.org/10.1016/j.jacep.2018.03.006>
- 609 26 Kapa, S. *et al.* Genetic testing for long-QT syndrome: distinguishing pathogenic mutations  
610 from benign variants. *Circulation* **120**, 1752-1760 (2009).  
611 <https://doi.org/10.1161/CIRCULATIONAHA.109.863076>
- 612 27 Sun, J. & MacKinnon, R. Cryo-EM Structure of a KCNQ1/CaM Complex Reveals Insights  
613 into Congenital Long QT Syndrome. *Cell* **169**, 1042-1050.e1049 (2017).  
614 <https://doi.org/10.1016/j.cell.2017.05.019>

- 615 28 Schwartz, P. J. *et al.* Mutation location and IKs regulation in the arrhythmic risk of long QT  
616 syndrome type 1: the importance of the KCNQ1 S6 region. *Eur Heart J* **42**, 4743-4755  
617 (2021). <https://doi.org/10.1093/eurheartj/ehab582>
- 618 29 Sun, J. & MacKinnon, R. Structural Basis of Human KCNQ1 Modulation and Gating. *Cell*  
619 **180**, 340-347.e349 (2020). <https://doi.org/10.1016/j.cell.2019.12.003>
- 620 30 Li, Z. *et al.* Structure of human Na(v)1.5 reveals the fast inactivation-related segments as  
621 a mutational hotspot for the long QT syndrome. *Proc Natl Acad Sci U S A* **118** (2021).  
622 <https://doi.org/10.1073/pnas.2100069118>
- 623 31 Napolitano, C. *et al.* Genetic testing in the long QT syndrome: development and validation  
624 of an efficient approach to genotyping in clinical practice. *Jama* **294**, 2975-2980 (2005).  
625 <https://doi.org/10.1001/jama.294.23.2975>
- 626 32 Barc, J. *et al.* Genome-wide association analyses identify new Brugada syndrome risk loci  
627 and highlight a new mechanism of sodium channel regulation in disease susceptibility.  
628 *Nat Genet* **54**, 232-239 (2022). <https://doi.org/10.1038/s41588-021-01007-6>
- 629 33 Yagi, N. *et al.* A challenge for mutation specific risk stratification in long QT syndrome type  
630 1. *J Cardiol* **72**, 56-65 (2018). <https://doi.org/10.1016/j.jjcc.2017.12.011>
- 631 34 Whiffin, N. *et al.* Using high-resolution variant frequencies to empower clinical genome  
632 interpretation. *Genet Med* **19**, 1151-1158 (2017). <https://doi.org/10.1038/gim.2017.26>
- 633 35 Lane, C. M. *et al.* Long QT syndrome type 5-Lite: Defining the clinical phenotype  
634 associated with the potentially proarrhythmic p.Asp85Asn-KCNE1 common genetic  
635 variant. *Heart Rhythm* **15**, 1223-1230 (2018).  
636 <https://doi.org/10.1016/j.hrthm.2018.03.038>
- 637 36 Giudicessi, J. R., Roden, D. M., Wilde, A. A. M. & Ackerman, M. J. Classification and  
638 Reporting of Potentially Proarrhythmic Common Genetic Variation in Long QT Syndrome  
639 Genetic Testing. *Circulation* **137**, 619-630 (2018).  
640 <https://doi.org/10.1161/circulationaha.117.030142>
- 641 37 Schwartz, P. J., Crotti, L. & George, A. L., Jr. Modifier genes for sudden cardiac death. *Eur*  
642 *Heart J* **39**, 3925-3931 (2018). <https://doi.org/10.1093/eurheartj/ehy502>
- 643 38 Wada, Y. *et al.* Common Ancestry-specific Ion Channel Variants Predispose to Drug-  
644 induced Arrhythmias. *Circulation* (2022).  
645 <https://doi.org/10.1161/circulationaha.121.054883>
- 646 39 Kapplinger, J. D. *et al.* Spectrum and prevalence of mutations from the first 2,500  
647 consecutive unrelated patients referred for the FAMILION long QT syndrome genetic test.  
648 *Heart Rhythm* **6**, 1297-1303 (2009). <https://doi.org/10.1016/j.hrthm.2009.05.021>
- 649 40 Walsh, R. *et al.* Enhancing rare variant interpretation in inherited arrhythmias through  
650 quantitative analysis of consortium disease cohorts and population controls. *Genet Med*  
651 **23**, 47-58 (2021). <https://doi.org/10.1038/s41436-020-00946-5>
- 652 41 Ng, C. A. *et al.* A massively parallel assay accurately discriminates between functionally  
653 normal and abnormal variants in a hotspot domain of KCNH2. *Am J Hum Genet* (2022).  
654 <https://doi.org/10.1016/j.ajhg.2022.05.003>
- 655 42 Crotti, L. *et al.* Calmodulin mutations and life-threatening cardiac arrhythmias: insights  
656 from the International Calmodulinopathy Registry. *Eur Heart J* **40**, 2964-2975 (2019).  
657 <https://doi.org/10.1093/eurheartj/ehz311>

- 658 43 Kang, P. W. *et al.* Calmodulin acts as a state-dependent switch to control a cardiac  
659 potassium channel opening. *Sci Adv* **6** (2020). <https://doi.org/10.1126/sciadv.abd6798>
- 660 44 Clerx, M., Heijman, J., Collins, P. & Volders, P. G. A. Predicting changes to I(Na) from  
661 missense mutations in human SCN5A. *Sci Rep* **8**, 12797 (2018).  
662 <https://doi.org/10.1038/s41598-018-30577-5>
- 663 45 Heyne, H. O. *et al.* Predicting functional effects of missense variants in voltage-gated  
664 sodium and calcium channels. *Sci Transl Med* **12** (2020).  
665 <https://doi.org/10.1126/scitranslmed.aay6848>
- 666 46 Parikh, V. N. Promise and Peril of Population Genomics for the Development of Genome-  
667 First Approaches in Mendelian Cardiovascular Disease. *Circ Genom Precis Med* **14**,  
668 e002964 (2021). <https://doi.org/10.1161/circgen.120.002964>
- 669 47 Gneccchi, M., Sala, L. & Schwartz, P. J. Precision Medicine and cardiac channelopathies:  
670 when dreams meet reality. *Eur Heart J* **42**, 1661-1675 (2021).  
671 <https://doi.org/10.1093/eurheartj/ehab007>
- 672 48 Backman, J. D. *et al.* Exome sequencing and analysis of 454,787 UK Biobank participants.  
673 *Nature* **599**, 628-634 (2021). <https://doi.org/10.1038/s41586-021-04103-z>
- 674 49 Taliun, D. *et al.* Sequencing of 53,831 diverse genomes from the NHLBI TOPMed Program.  
675 *Nature* **590**, 290-299 (2021). <https://doi.org/10.1038/s41586-021-03205-y>
- 676 50 Weile, J. & Roth, F. P. Multiplexed assays of variant effects contribute to a growing  
677 genotype-phenotype atlas. *Hum Genet* **137**, 665-678 (2018).  
678 <https://doi.org/10.1007/s00439-018-1916-x>
- 679 51 Hille, B. *Ion channels of excitable membranes*. 3rd edn, (Sinauer, 2001).
- 680 52 Glazer, A. M. *et al.* Arrhythmia Variant Associations and Reclassifications in the eMERGE-  
681 III Sequencing Study. *Circulation* (2021).  
682 <https://doi.org/10.1161/circulationaha.121.055562>
- 683 53 Renaux, A. *et al.* ORVAL: a novel platform for the prediction and exploration of disease-  
684 causing oligogenic variant combinations. *Nucleic Acids Res* **47**, W93-w98 (2019).  
685 <https://doi.org/10.1093/nar/gkz437>  
686
